# Supplementary material for: Mapping dopaminergic projections in the human brain with resting-state fMRI
Source: eLife. 2022 Feb 3;11:e71846. doi: 10.7554/eLife.71846 (PMC8843090; doi:10.7554/eLife.71846)
Supplement: Table 2—source data 1. [file elife-71846-table2-data1.xlsx]

## Sheet: for_source_file
subject	type	age	sex	FAB_totalscore	disease_duration	Sum_L_dopa_dose_home	UPDRS_placebo	UPDRS_ldopa	dominant_side_dopamine_depletion	session1	session2	meanFD_placebo_session	meanFD_ldopa_session
c01	control	59	female	18								0.0894605
c03	control	62	female	18								0.148392
c04	control	64	female	18								0.0692527
c05	control	42	male	17								0.0610946
c06	control	55	male	18								0.145306
c07	control	55	male	18								0.0596692
c08	control	62	female	18								0.0538076
c09	control	69	female	16								0.054929
c10	control	57	female	18								0.0677853
c11	control	45	male	17								0.0351627
c12	control	75	female	17								0.0680658
c13	control	60	female	18								0.0991185
c14	control	55	male	18								0.160449
c15	control	46	male	18								0.0572008
c16	control	73	female	17								0.122254
c17	control	68	female	18								0.276166
c19	control	80	male	18								0.071007
c20	control	72	male	17								0.198241
c21	control	66	male	16								0.0897807
c22	control	72	female	18								0.0469419
p02	patient	46	female	18	NA	NA	66	51	right	PLACEBO	LDOPA	0.0678135	0.0650698
p08	patient	65	female	18	NA	375	37	25	right	PLACEBO	LDOPA	0.0645328	0.06555
p11	patient	64	female	18	NA	375	41	36	right	LDOPA	PLACEBO	0.103388	0.0921167
p14	patient	64	female	18	NA	375	13	21	right	PLACEBO	LDOPA	0.154345	0.152221
p18	patient	67	male	17	2	187.5	70	48	left	PLACEBO	LDOPA	0.177586	0.124431
p19	patient	64	female	15	26	187.5	48	40	left	PLACEBO	LDOPA	0.0992025	0.151624
p21	patient	70	female	18	5	937.5	67	34	left	PLACEBO	LDOPA	0.116951	0.109984
p24	patient	57	male	18	6	375	29	25	right	LDOPA	PLACEBO	0.0972722	0.106445
p27	patient	63	female	18	1	NA	55	54	right	LDOPA	PLACEBO	0.121826	0.117294
p28	patient	55	female	17	1	375	20	20	left	PLACEBO	LDOPA	0.0490344	0.0376311
p29	patient	78	female	17	6	300	46	35	right	LDOPA	PLACEBO	0.0916379	0.108257
p30	patient	65	male	17	1	NA	28	12	right	PLACEBO	LDOPA	0.121954	0.150144
p33	patient	58	female	16	2	450	44	40	right	LDOPA	PLACEBO	0.0948421	0.136581
p36	patient	81	male	17	3	300	52	43	right	PLACEBO	LDOPA	0.159285	0.220017
p38	patient	77	male	14	6	800	64	57	left	LDOPA	PLACEBO	0.0803991	0.0809375
p40	patient	73	female	17	7	650	29	35	right	PLACEBO	LDOPA	0.0680694	0.0718135
p42	patient	62	female	17	1	300	23	34	left	PLACEBO	LDOPA	0.0524643	0.0575634
p43	patient	63	male	18	1	600	35	24	left	LDOPA	PLACEBO	0.0781868	0.099809
p47	patient	57	female	18	2	NA	33	30	left	PLACEBO	LDOPA	0.0607546	0.0596943
p48	patient	62	female	17	5	800	42	23	right	PLACEBO	LDOPA	0.206217	0.222203
p49	patient	73	male	18	9	300	50	28	left	LDOPA	PLACEBO	0.127697	0.20308
p50	patient	62	female	18	5	300	60	46	left	LDOPA	PLACEBO	0.188084	0.182071
p56	patient	69	male	16	1	400	63	44	right	LDOPA	PLACEBO	0.140085	0.155438
p59	patient	51	male	18	2	200	33	24	left	PLACEBO	LDOPA	0.0757875	0.0909398
p60	patient	46	male	18	6	400	34	14	left	LDOPA	PLACEBO	0.0697352	0.0679091
p62	patient	57	female	17	2	400	19	19	left	LDOPA	PLACEBO	0.0499542	0.0457085
p64	patient	38	male	16	8	800	36	27	left	LDOPA	PLACEBO	0.0874921	0.100803
p70	patient	38	female	18	5	1100	38	28	right	PLACEBO	LDOPA	0.172017	0.0664112
p71	patient	75	male	17	1	300	17	17	left	LDOPA	PLACEBO	0.126211	0.101122
p72	patient	65	female	18	1	750	34	30	left	LDOPA	PLACEBO	0.211649	0.221964
p73	patient	75	male	18	6	300	63	66	right	LDOPA	PLACEBO	0.236327	0.525203
p74	patient	63	female	18	1	400	28	25	right	PLACEBO	LDOPA	0.154706	0.15975
p75	patient	57	female	18	0.5	450	30	19	left	LDOPA	PLACEBO	0.0844624	0.117867
p76	patient	61	female	18	2	300	29	27	right	LDOPA	PLACEBO	0.0659136	0.0672097
p77	patient	49	male	16	1	500	34	13	right	PLACEBO	LDOPA	0.118991	0.105164
p80	patient	42	male	16	4	700	76	54	right	PLACEBO	LDOPA	0.187728	0.197685
p81	patient	54	female	17	3	450	45	30	right	LDOPA	PLACEBO	0.133837	0.12206
p82	patient	59	male	18	1.5	NA	27	21	left	LDOPA	PLACEBO	0.146908	0.138323
p83	patient	49	female	17	1	NA	20	25	left	PLACEBO	LDOPA	0.0990876	0.0811616
